# Supplementary material for: MPV17 Prevented Myocardial Ferroptosis and Ischemic Cardiac Injury through Maintaining SLC25A10 Mediated Mitochondrial Glutathione Import
Source: Preprints.org preprint supplement (doi:10.20944/preprints202409.1896.v1), 2024-09-24
Supplement: Supplementary file 1 [file supplementary]

**
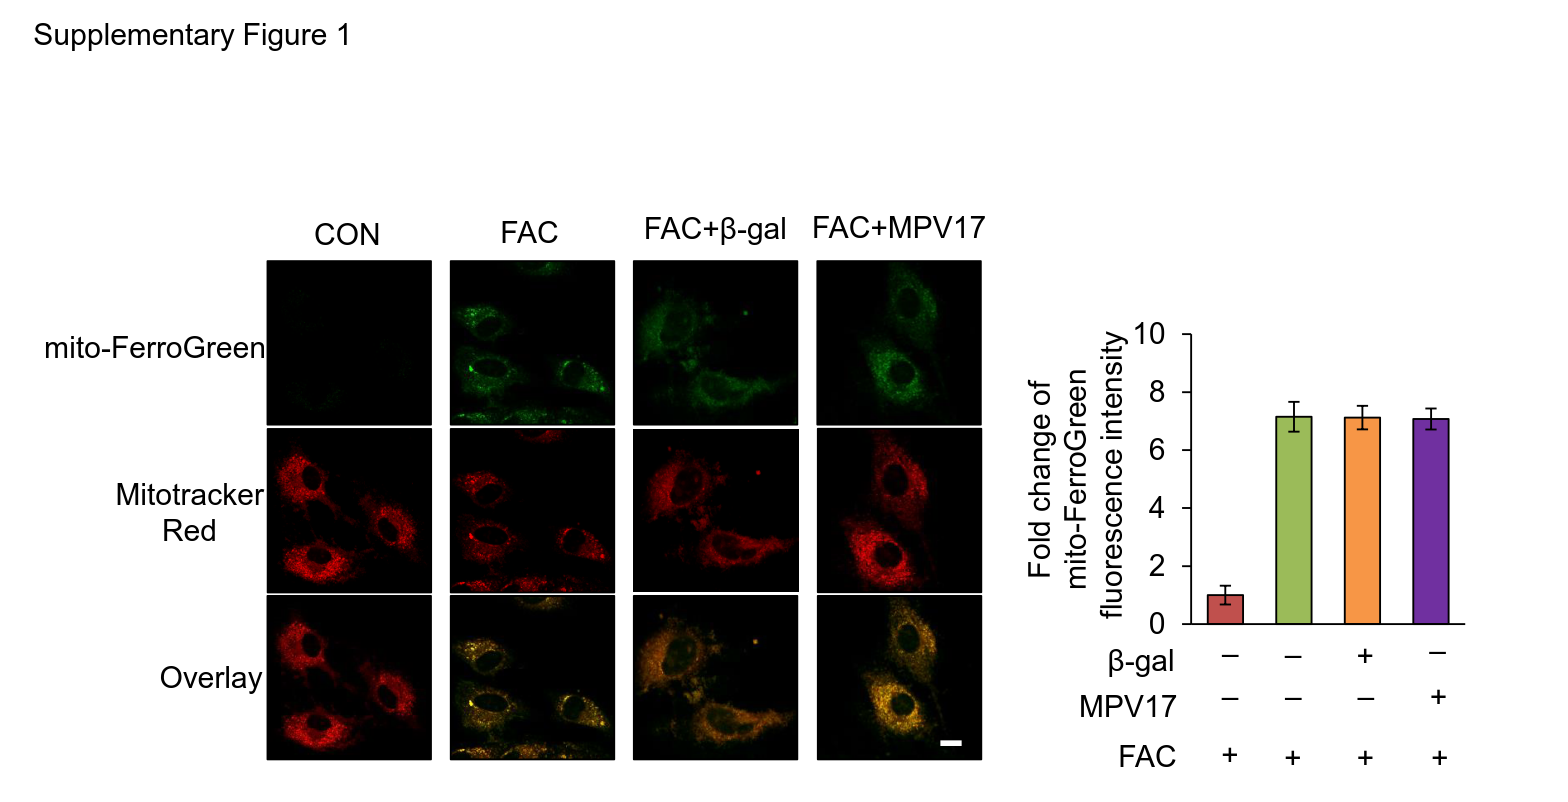
**

***Supplementary Figure S1:*** Detection of mitochondrial Fe2+ levels with mito-FerroGreen; Green, mito-FerroGreen; Red, Mitotracker.
